# Supplementary material
Source: publisher site journal article supplement (https://www.dovepress.com/get_supplementary_file.php?f=287287.docx)

**s-Fig. 1. Establishment of type 2 diabetic mouse models and** **Western blotting of** **VE-Cadherin and** **Vimentin in CMECs treated with HG+PA.**

1. Fasting blood-glucose of experimental animals were measured on a weekly basis (n= 20). **(B)** Body weight of experimental animals were measured on a weekly basis (n= 20). **(C** and **D)** Water intake and food intake of experimental animals were measured on a weekly basis (n= 20). **(E** and **F)** Total cholesterol and triglyceride of experimental animals were measured on a weekly basis (n= 20). **(G)** Fasting plasma insulin of experimental animals were measured on a weekly basis (n= 20). **(H** and **I)** Western blotting and quantitative analysis of VE-Cadherin and Vimentin protein levels in CMECs treated with HG+PA.


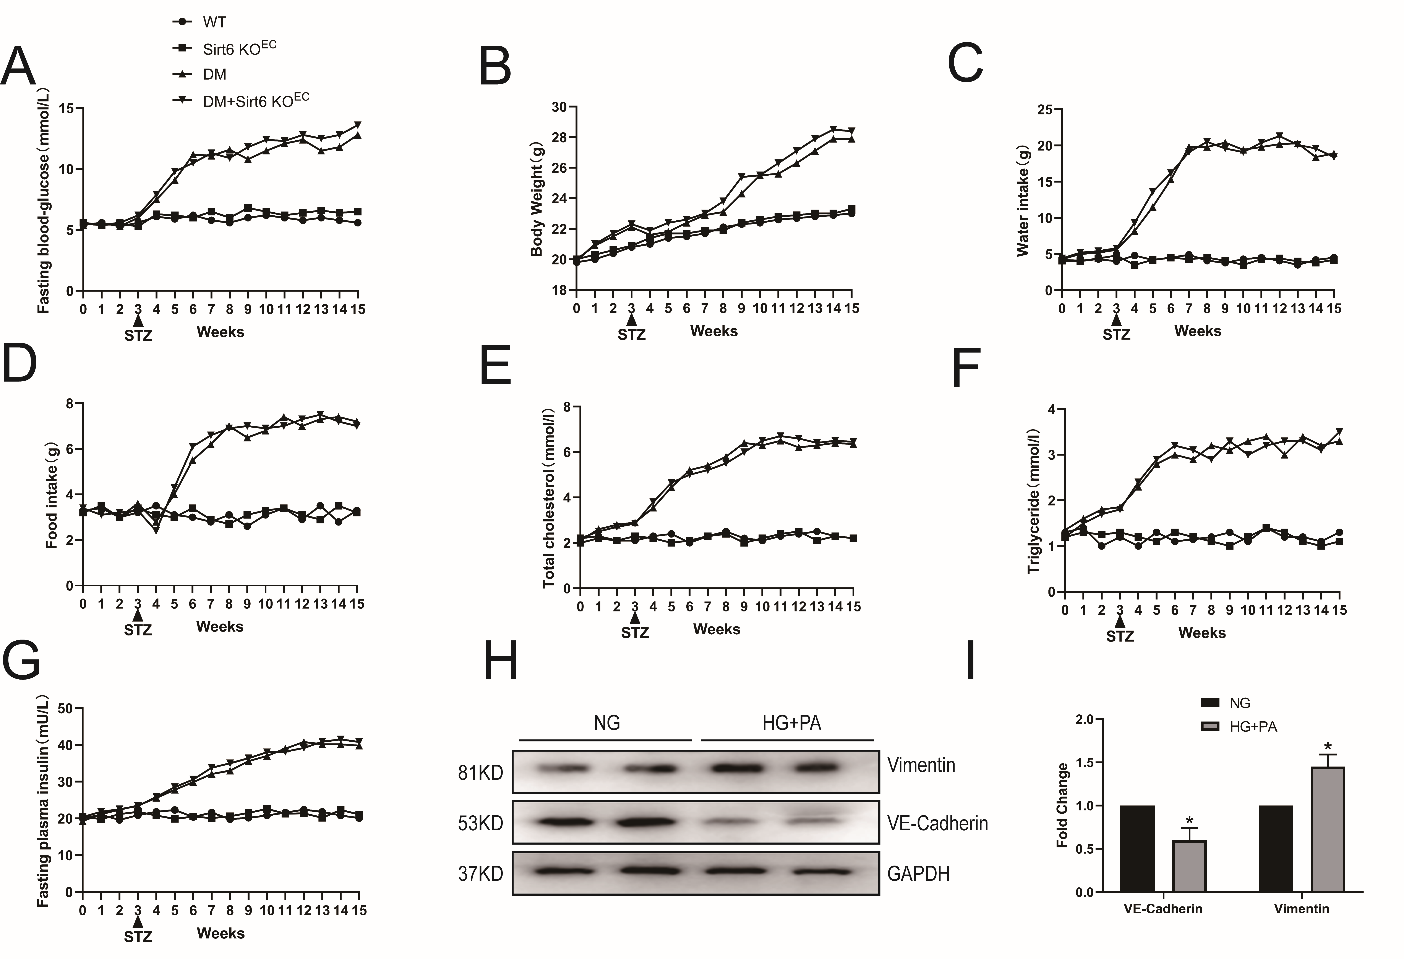

Supplement: Supplementary file 1 [file get_supplementary_file.php]
